# Supplementary material
Source: PubMed Central journal article supplement (PMC5056141)
Supplement: NIHMS805512-supplement-Supp_Info_04.pdf [file NIHMS805512-supplement-Supp_Info_04.pdf]

A)

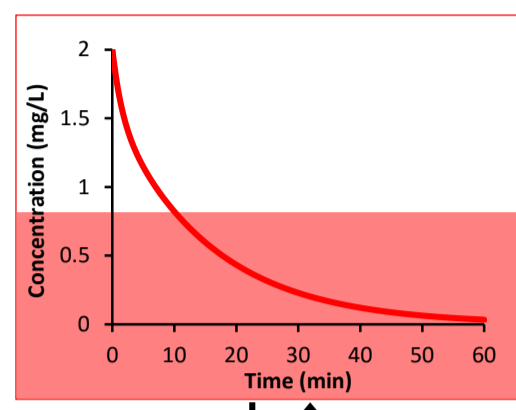

$CL_{in}^s$   $CL_{ef}^s$

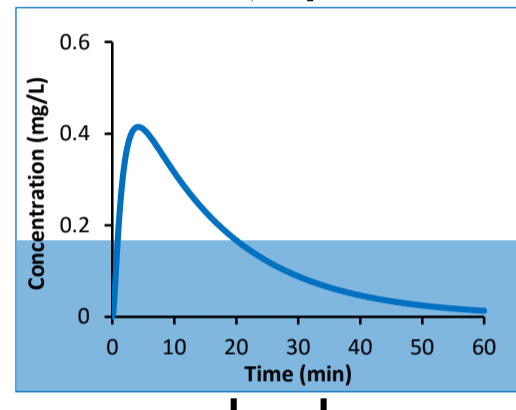

$CL_{ef}^c$   $CL_{met}$

E)

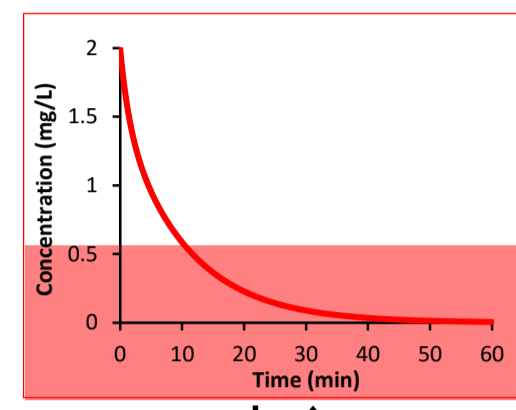

$CL_{in}^s$   $CL_{ef}^s$

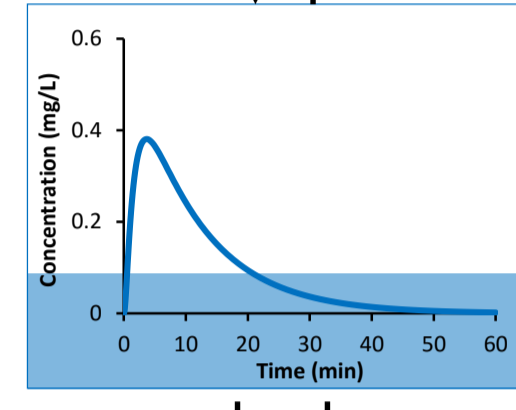

$CL_{ef}^c$   $CL_{met}$

B)

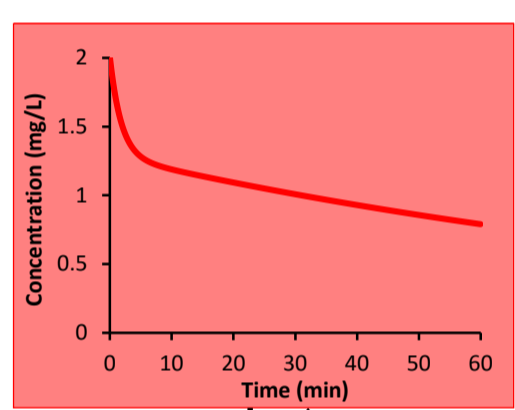

$CL_{in}^s$   $CL_{ef}^s$

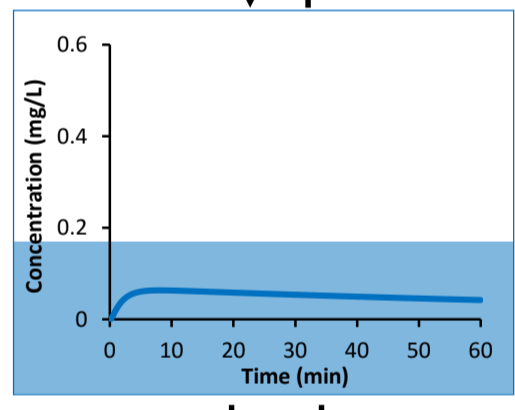

$CL_{ef}^c$   $CL_{met}$

C)

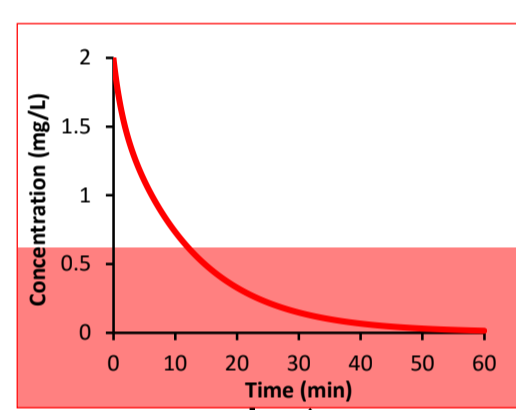

$CL_{in}^s$   $CL_{ef}^s$

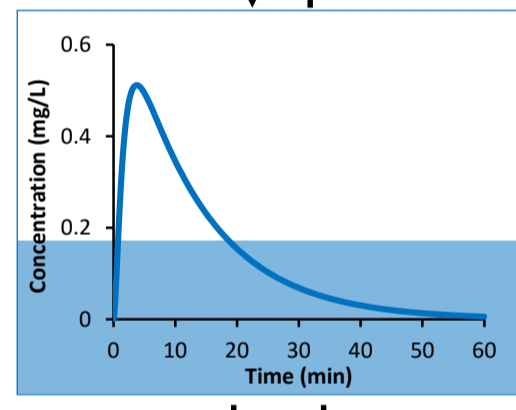

$CL_{ef}^c$   $CL_{met}$

D)

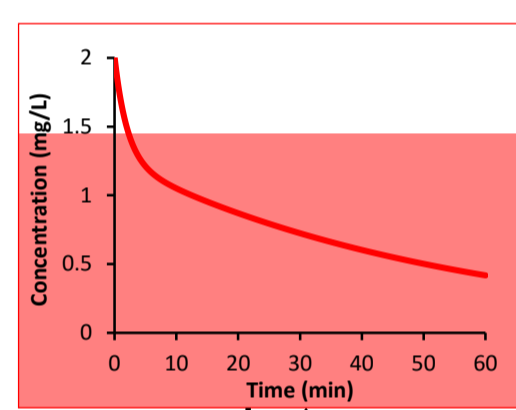

$CL_{in}^s$   $CL_{ef}^s$

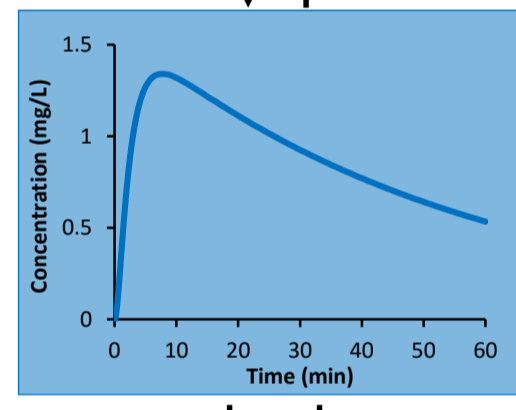

$CL_{ef}^c$   $CL_{met}$

F)

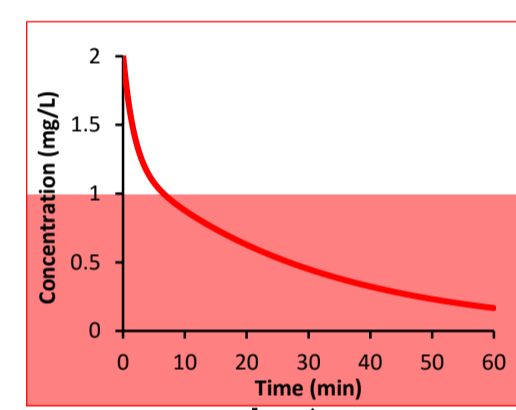

$CL_{in}^s$   $CL_{ef}^s$

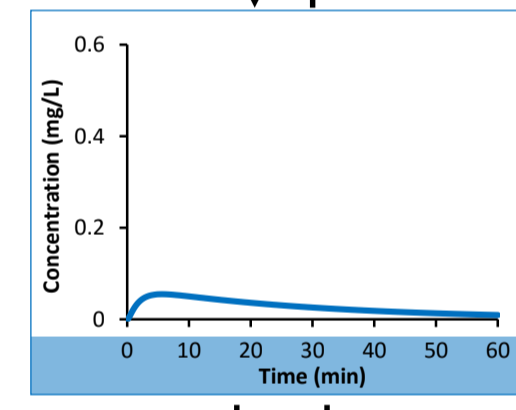

$CL_{ef}^c$   $CL_{met}$

G)

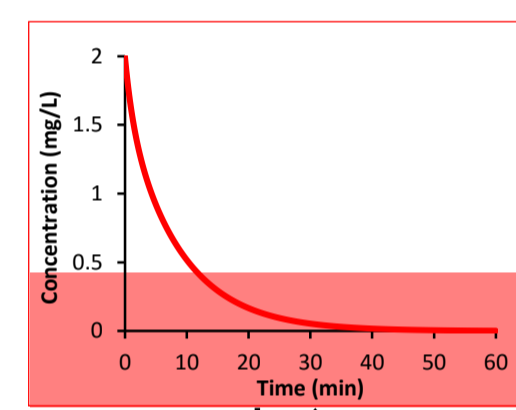

$CL_{in}^s$   $CL_{ef}^s$

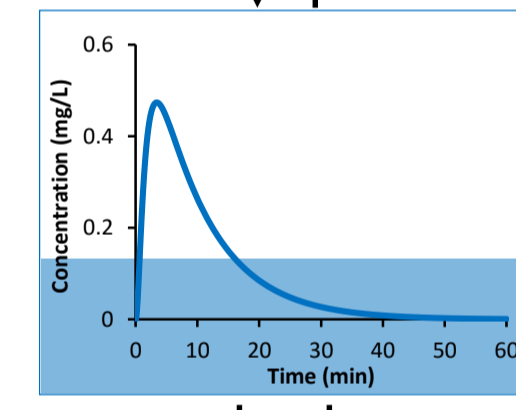

$CL_{ef}^c$   $CL_{met}$

H)

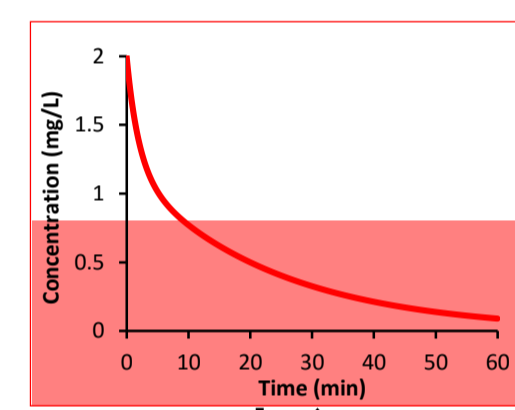

$CL_{in}^s$   $CL_{ef}^s$

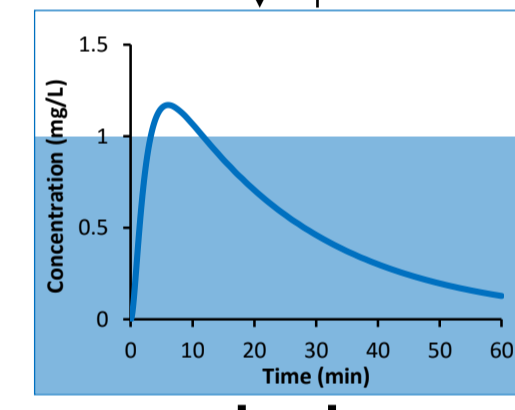

$CL_{ef}^c$   $CL_{met}$
